# Supplementary material for: Metal selection tactic in a nitronyl nitroxide biradical-3d–4f macrocycle for boosting photothermal conversion and the application of solar-driven water evaporation
Source: Royal Society of Chemistry journal article supplement (doi:10.1039/d5qi00727e), 2025-01-01
Supplement: d5qi00727e1.pdf [file d5qi00727e1.pdf]

## Supporting Information

### **Metal Selection Tactic in Nitronyl Nitroxide Biradical-3d-4f Macrocycle for Boosting Photothermal Conversion and Application of Solar-Driven Water Evaporation**

Hongdao Li<sup>\*ab</sup>, Chaoyi Jin<sup>b</sup>, Lu Xi,<sup>b</sup> Lifeng Ding,<sup>a</sup> Jing Han<sup>b</sup> and Pei Jing<sup>b</sup>

<sup>a</sup> *Department of Chemistry and Chemical Engineering, Taiyuan Institute of Technology, Taiyuan 030008, China*

<sup>b</sup> *Department of Chemistry, Key Laboratory of Advanced Energy Materials Chemistry and Tianjin Key Laboratory of Metal and Molecule-based Material Chemistry, College of Chemistry, Nankai University, Tianjin 300071, China*

## Table of Content

|                                                                 |     |
|-----------------------------------------------------------------|-----|
| <b>1. Experimental Procedures</b>                               | S3  |
| Materials and Physical measurements                             | S3  |
| Synthesis                                                       | S3  |
| X-ray Crystallography                                           | S4  |
| <b>2. Supporting Tables</b>                                     | S5  |
| <b>3. Supporting Figures</b>                                    | S8  |
| <b>4. Photothermal conversion efficiency calculation</b>        | S21 |
| <b>5. Solar-driven water evaporation efficiency calculation</b> | S24 |
| <b>6. References</b>                                            | S25 |

## 1. Experimental Procedures

### Materials and Physical measurements

All the reagents and solvents were commercially available and used as received. FT-IR data were recorded on a Vector27 Bruker Spectrophotometer with KBr pellets in the 4000-400  $\text{cm}^{-1}$  region. Elemental analyses for C, H, and N were recorded on a Perkin-Elmer 240C analyzer. The PXRD data were collected on a Bruker Advance D8 diffractometer with Cu radiation ( $\lambda = 1.54056 \text{ \AA}$ ) at room temperature. TGA data were obtained on a STA 449C thermal analysis system under  $\text{N}_2$  atmosphere. X-Ray photoelectron spectroscopy (XPS) measurements were performed on a Thermo Fisher Scientific ESCALAB Xi+ system with an Al  $K\alpha$  source. UV-Vis-NIR Diffuse reflectance spectra (DRS) were recorded using a UV-Vis-NIR spectrophotometer equipped with an integrating sphere, and  $\text{BaSO}_4$  powder was used as the reference for the baseline correction.

Photothermal conversion: 270 mg of **DyCo-1**, **YbCo-2** and **DyZn-3** thin round layer (thickness of 1.5 mm) with the largest possible surface area (diameter of 1.5 cm) placed on a tripod at a distance of 20 cm from the 1064 nm laser ( $0.3 \text{ W cm}^{-2}$ ). The infrared camera was used to capture the infrared videos of **DyCo-1**, **YbCo-2** and **DyZn-3** samples when the illumination was on/off. The infrared photos and real-time temperatures were extracted from the video.

**DyCo-1**-loaded polyethylene terephthalate (PET) sample was put on a plastic evaporating dish filled with pure water, surrounded by thermally insulating foam. Sunlight was simulated by a Xenon lamp with an optical filter (AM 1.5 G) and used to irradiate the sample under  $0.1 \text{ W cm}^{-2}$  power density. The mass change of the water was recorded by an electronic balance (accuracy of 0.00001 g). The IR camera was used to measure the temperature.

### Synthesis of bisNITCH<sub>2</sub>bz

Ligand bisNITCH<sub>2</sub>bz was synthesized according to the previous method.<sup>S1</sup>

### Synthesis of DyCo-1, YbCo-2, DyZn-3 and GdCo-4

$\text{Ln}(\text{hfac})_3 \cdot 2\text{H}_2\text{O}$  (0.01 mmol) and  $\text{M}(\text{hfac})_2 \cdot 2\text{H}_2\text{O}$  (0.01 mmol) was suspended in 25 mL of n-hexane to reflux for 5 hours until most of them dissolved, and a solution of bisNITCH<sub>2</sub>bz (0.01 mmol) in 6 mL of  $\text{CHCl}_3$  or  $\text{CH}_2\text{Cl}_2$  was introduced with stirring. After 30 min, the resulting blue solution was filtered, and the above filtrate store in the refrigerator ( $0-5 \text{ }^\circ\text{C}$ ) to generate blue crystals.

**DyCo-1:** Yield 80%.  $C_{47}H_{37}CoDyF_{30}N_8O_{14}$  (1729.22 g/mol) (without solvent molecules): calcd. C 32.64, H 2.15, N 6.48; found. C 32.62, H 2.11, N 6.46; FT-IR (KBr): 3147(w), 1652(s), 1502 (m), 1364 (m), 1261 (s), 1203 (s), 1147 (s), 800 (m), 665 (m), 582 (m)  $cm^{-1}$ .

**YbCo-2:** Yield 83%.  $C_{47}H_{37}CoYbF_{30}N_8O_{14}$  (1739.76 g/mol) (without solvent molecules): calcd. C 32.44, H 2.14, N 6.44; found. C 32.41, H 2.17, N 6.42; FT-IR (KBr): 3145(w), 1654(s), 1501 (m), 1366 (m), 1260 (s), 1200 (s), 1143 (s), 801 (m), 667 (m), 583 (m)  $cm^{-1}$ .

**DyZn-3:** Yield 81%.  $C_{47}H_{37}ZnDyF_{30}N_8O_{14}$  (1735.70 g/mol) (without solvent molecules): calcd. C 32.52, H 2.14, N 6.45; found. C 32.56, H 2.17, N 6.43; FT-IR (KBr): 3145(w), 1652(s), 1502 (m), 1364 (m), 1263 (s), 1200 (s), 1147 (s), 801 (m), 669 (m), 581 (m)  $cm^{-1}$ .

**GdCo-4:** Yield 80%.  $C_{47}H_{37}CoGdF_{30}N_8O_{14}$  (1723.97 g/mol) (without solvent molecules): calcd. C 32.74, H 2.16, N 6.49; found. C 32.70, H 2.15, N 6.46; FT-IR (KBr): 3148(w), 1652(s), 1501 (m), 1364 (m), 1265 (s), 1200 (s), 1147 (s), 801 (m), 669 (m), 583 (m)  $cm^{-1}$ .

The peak observed at about 1502  $cm^{-1}$  (m,  $\nu_{C=N}$ ) is attributed nitronyl nitroxide ligand. Peaks at about 1265  $cm^{-1}$  (s), 1200  $cm^{-1}$  (s) and 1147  $cm^{-1}$  ( $\nu_{C-F}$ ) are attributed to the coligand hfac<sup>-</sup>.

### X-ray Crystallography

Single-crystal structure investigations were performed on a Rigaku Saturn diffractometer equipped with a CCD area detector and graphite-monochromated Mo/K $\alpha$  radiation ( $\lambda = 0.71073$  Å) at 150 K or 100 K. Empirical absorption corrections based on symmetry equivalent reflections were applied. The structure solution was done with direct methods using SHELXS-2014<sup>S2</sup>, and structure refinements were performed by a full-matrix least-squares procedure using SHELXL-2014<sup>S3</sup>. Anisotropic thermal parameters were assigned to all non-hydrogen atoms. Hydrogen atoms were placed in calculated, ideal positions and were refined isotropically as riding on their respective C atoms. For **YbCo-2** and **GdCo-4**, the SQUEEZE option in PLATON<sup>S4</sup> was used to remove the disordered solvent water molecules. CCDC 2419394-2419397 contain the supplementary crystallographic data for this paper. These data can be obtained free of charge from The Cambridge Crystallographic Data Centre.

## 2. Supporting Tables

**Table S1.** The crystal data and refinement details of **1** and **2**.

| Complex                                                                     | <b>1</b>                                                                                                                         | <b>2</b>                                                                                                                        |
|-----------------------------------------------------------------------------|----------------------------------------------------------------------------------------------------------------------------------|---------------------------------------------------------------------------------------------------------------------------------|
| Empirical formula                                                           | C <sub>101</sub> H <sub>89</sub> Cl <sub>3</sub> Co <sub>2</sub> Dy <sub>2</sub> F <sub>60</sub> N <sub>16</sub> O <sub>28</sub> | C <sub>95</sub> H <sub>75</sub> Cl <sub>3</sub> Co <sub>2</sub> Yb <sub>2</sub> F <sub>60</sub> N <sub>16</sub> O <sub>28</sub> |
| <i>Mr</i>                                                                   | 3664.0                                                                                                                           | 3598.91                                                                                                                         |
| <i>T</i> (K)                                                                | 150.0                                                                                                                            | 100.15                                                                                                                          |
| Crystal system                                                              | monoclinic                                                                                                                       | monoclinic                                                                                                                      |
| Space group                                                                 | <i>P</i> 2 <sub>1</sub> / <i>c</i>                                                                                               | <i>P</i> 2 <sub>1</sub> / <i>c</i>                                                                                              |
| <i>a</i> /Å                                                                 | 17.1476(5)                                                                                                                       | 16.9980(4)                                                                                                                      |
| <i>b</i> /Å                                                                 | 22.0824(7)                                                                                                                       | 22.0568(4)                                                                                                                      |
| <i>c</i> /Å                                                                 | 19.8106(6)                                                                                                                       | 19.4263(4)                                                                                                                      |
| $\alpha$ /°                                                                 | 90                                                                                                                               | 90                                                                                                                              |
| $\beta$ /°                                                                  | 108.3030(10)                                                                                                                     | 106.823(2)                                                                                                                      |
| $\gamma$ /°                                                                 | 90                                                                                                                               | 90                                                                                                                              |
| <i>V</i> /Å <sup>3</sup>                                                    | 7122.0(4)                                                                                                                        | 6971.6(3)                                                                                                                       |
| <i>Z</i>                                                                    | 4                                                                                                                                | 4                                                                                                                               |
| <i>D</i> <sub>calcd</sub> /g cm <sup>-3</sup>                               | 1.764                                                                                                                            | 1.771                                                                                                                           |
| $\theta$ /°                                                                 | 2.502-52.772                                                                                                                     | 6.744-60.848                                                                                                                    |
| <i>F</i> (000)                                                              | 3732                                                                                                                             | 3648                                                                                                                            |
| Reflections collected                                                       | 64388                                                                                                                            | 62116                                                                                                                           |
| Unique reflns/ <i>R</i> <sub>int</sub>                                      | 14586/0.0638                                                                                                                     | 21122/0.0367                                                                                                                    |
| GOF ( <i>F</i> <sup>2</sup> )                                               | 1.041                                                                                                                            | 1.036                                                                                                                           |
| <i>R</i> <sub>1</sub> , <i>wR</i> <sub>2</sub> ( <i>I</i> > 2σ( <i>I</i> )) | 0.0672, 0.1957                                                                                                                   | 0.0572, 0.1629                                                                                                                  |
| <i>R</i> <sub>1</sub> , <i>wR</i> <sub>2</sub> (all data)                   | 0.0772, 0.2023                                                                                                                   | 0.0760, 0.1795                                                                                                                  |

**Table S2.** The crystal data and refinement details of **3** and **4**.

| Complex                                                                     | <b>3</b>                                                                                                                        | <b>4</b>                                                                                                                         |
|-----------------------------------------------------------------------------|---------------------------------------------------------------------------------------------------------------------------------|----------------------------------------------------------------------------------------------------------------------------------|
| Empirical formula                                                           | C <sub>96</sub> H <sub>78</sub> Cl <sub>4</sub> Zn <sub>2</sub> Dy <sub>2</sub> F <sub>60</sub> N <sub>16</sub> O <sub>28</sub> | C <sub>101</sub> H <sub>89</sub> Cl <sub>3</sub> Co <sub>2</sub> Gd <sub>2</sub> F <sub>60</sub> N <sub>16</sub> O <sub>28</sub> |
| <i>Mr</i>                                                                   | 3641.27                                                                                                                         | 3653.50                                                                                                                          |
| <i>T</i> (K)                                                                | 150.0                                                                                                                           | 100.15                                                                                                                           |
| Crystal system                                                              | monoclinic                                                                                                                      | monoclinic                                                                                                                       |
| Space group                                                                 | <i>P</i> 2 <sub>1</sub> / <i>n</i>                                                                                              | <i>P</i> 2 <sub>1</sub> / <i>c</i>                                                                                               |
| <i>a</i> /Å                                                                 | 19.843(3)                                                                                                                       | 17.2859(3)                                                                                                                       |
| <i>b</i> /Å                                                                 | 12.246(2)                                                                                                                       | 21.9920(4)                                                                                                                       |
| <i>c</i> /Å                                                                 | 29.537(5)                                                                                                                       | 19.1401(4)                                                                                                                       |
| <i>α</i> /°                                                                 | 90                                                                                                                              | 90                                                                                                                               |
| <i>β</i> /°                                                                 | 103.231(6)                                                                                                                      | 106.412(2)                                                                                                                       |
| <i>γ</i> /°                                                                 | 90                                                                                                                              | 90                                                                                                                               |
| <i>V</i> /Å <sup>3</sup>                                                    | 6987.2(19)                                                                                                                      | 6979.7(2)                                                                                                                        |
| <i>Z</i>                                                                    | 4                                                                                                                               | 4                                                                                                                                |
| <i>D</i> <sub>calcd</sub> /g cm <sup>-3</sup>                               | 1.811                                                                                                                           | 1.754                                                                                                                            |
| <i>θ</i> /°                                                                 | 2.796-53.242                                                                                                                    | 7.104-61.292                                                                                                                     |
| <i>F</i> (000)                                                              | 3748.0                                                                                                                          | 3624                                                                                                                             |
| Reflections collected                                                       | 96805                                                                                                                           | 47969                                                                                                                            |
| Unique reflns/ <i>R</i> <sub>int</sub>                                      | 14676/0.0859                                                                                                                    | 21578/0.0480                                                                                                                     |
| GOF ( <i>F</i> <sup>2</sup> )                                               | 0.950                                                                                                                           | 0.961                                                                                                                            |
| <i>R</i> <sub>1</sub> , <i>wR</i> <sub>2</sub> ( <i>I</i> > 2σ( <i>I</i> )) | 0.0934, 0.2404                                                                                                                  | 0.0554, 0.1521                                                                                                                   |
| <i>R</i> <sub>1</sub> , <i>wR</i> <sub>2</sub> (all data)                   | 0.1048, 0.2480                                                                                                                  | 0.0807, 0.1729                                                                                                                   |

**Table S3.** The important bond lengths [ $\text{\AA}$ ] and angles [ $^\circ$ ] for **1** and **2**.

| Complex          | <b>1</b>           | <b>2</b>           |
|------------------|--------------------|--------------------|
| Ln-O(rad)        | 2.337(4), 2.339(5) | 2.286(4), 2.301(4) |
| Ln-O(hfac)       | 2.340(5)-2.386(5)  | 2.294(4)-2.343(4)  |
| Co-N             | 2.165(5), 2.112(5) | 2.154(4), 2.108(4) |
| Co-O(hfac)       | 2.043(5)-2.106(5)  | 2.042(4)-2.101(4)  |
| O(rad)-Ln-O(rad) | 138.30(18)         | 137.14(15)         |
| N-Co-N           | 97.9(2)            | 97.47(17)          |

**Table S4.** The important bond lengths [ $\text{\AA}$ ] and angles [ $^\circ$ ] for **3** and **4**.

| Complex          | <b>3</b>           | <b>4</b>           |
|------------------|--------------------|--------------------|
| Ln-O(rad)        | 2.337(6), 2.288(6) | 2.341(3), 2.367(3) |
| Ln-O(hfac)       | 2.322(6)-2.375(6)  | 2.371(3)-2.394(3)  |
| Zn(Co)-N         | 2.104(7), 2.126(8) | 2.141(4), 2.100(4) |
| Zn(Co)-O(hfac)   | 2.054(7)-2.129(7)  | 2.045(3)-2.100(3)  |
| O(rad)-Ln-O(rad) | 137.5(2)           | 139.33(12)         |
| N-Zn(Co)-N       | 96.5(3)            | 96.93(14)          |

**Table S5.** SHAPE analysis of  $\text{Ln}^{\text{III}}$  ion for complexes **1-4**.

|             | SAPR-8 | TDD-8        | BTPR-8 |
|-------------|--------|--------------|--------|
| <b>1-Dy</b> | 2.231  | <b>0.257</b> | 2.518  |
| <b>2-Yb</b> | 2.101  | <b>0.252</b> | 2.458  |
| <b>3-Dy</b> | 1.538  | <b>0.327</b> | 2.154  |
| <b>4-Gd</b> | 2.079  | <b>0.381</b> | 2.225  |

SAPR-8 ( $D_{4d}$ ): Square antiprism; TDD-8 ( $D_{2d}$ ): Triangular dodecahedron; BTPR-8 ( $C_{2v}$ ): Biaugmented trigonal prism

### 3. Supporting Figures

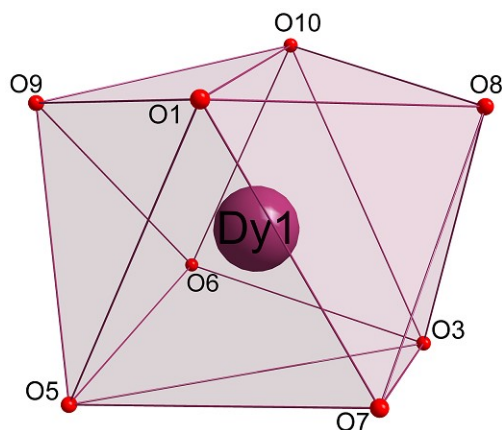

**Fig. S1.** Coordination environment of the Dy<sup>III</sup> ion in compound **DyCo-1**.

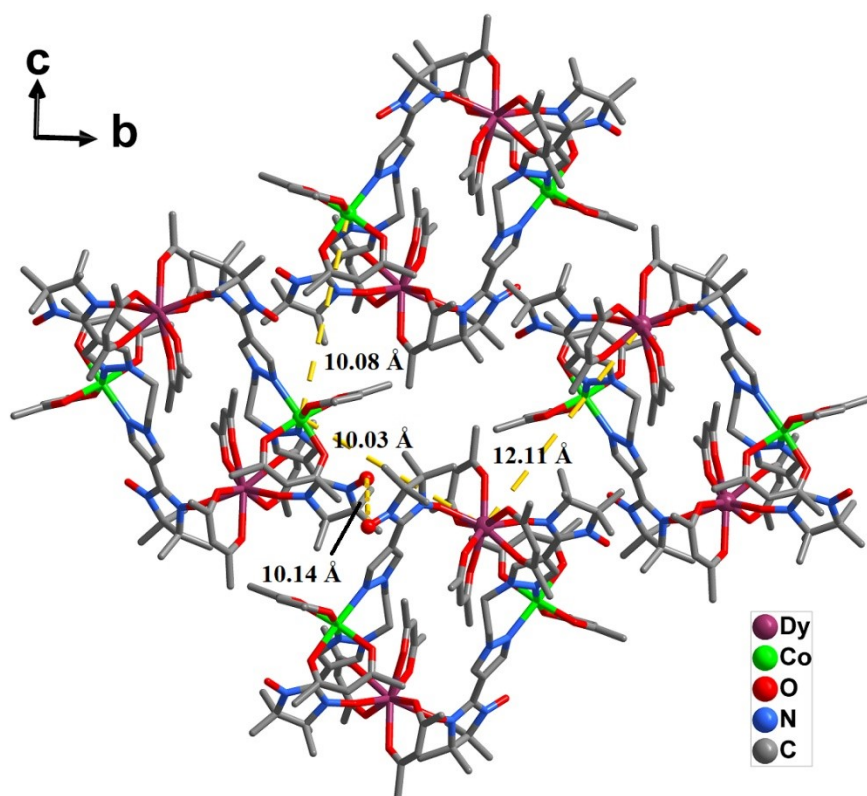

**Fig. S2.** Molecular packing along the *a*-axis direction for **DyCo-1**. Free solvent molecules, H and F atoms have been omitted.



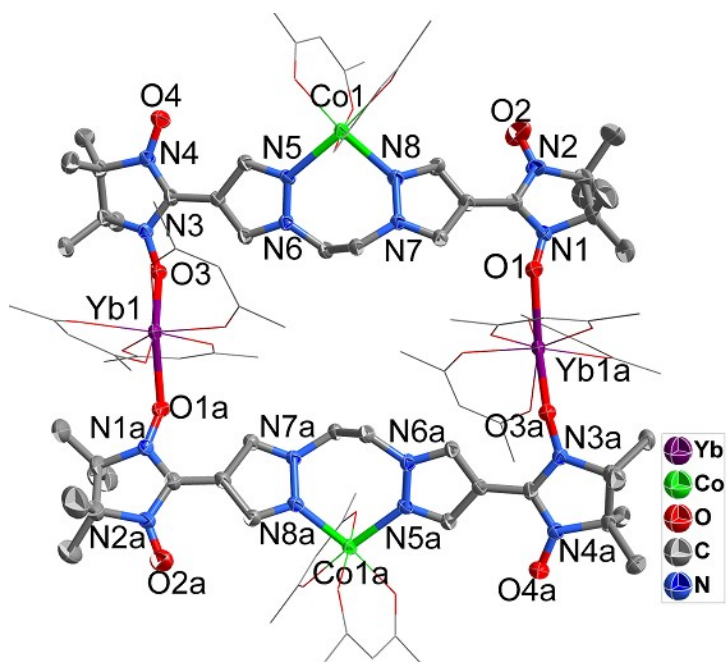

**Fig. S3.** Molecular structure for **YbCo-2**. Free solvent molecules, H and F atoms have been omitted.

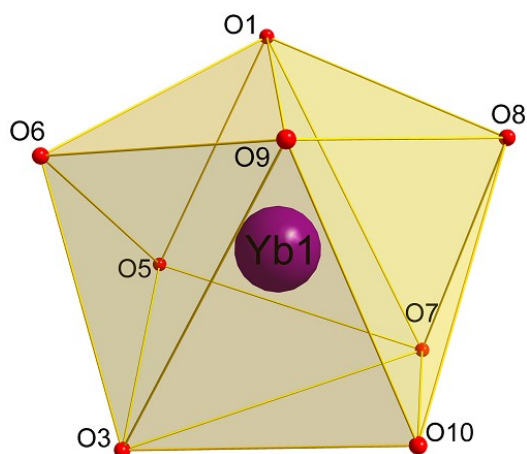

**Fig. S4.** Coordination environment of the Yb<sup>III</sup> ion in compound **YbCo-2**.

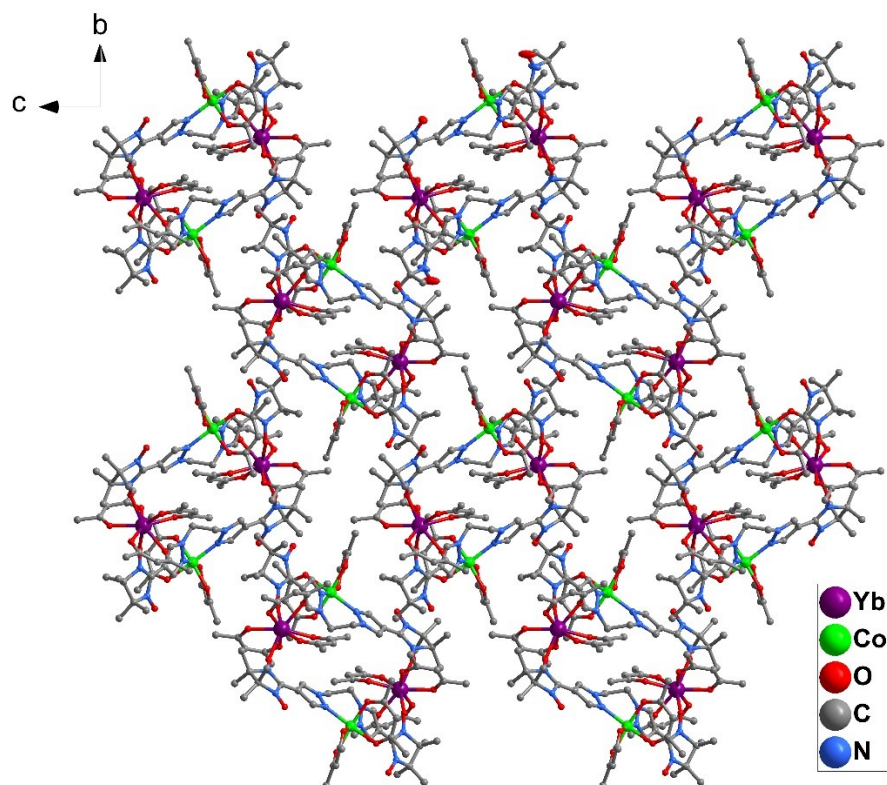

**Fig. S5.** Molecular packing along the *a*-axis direction for **YbCo-2**. Free solvent molecules, H and F atoms have been omitted.

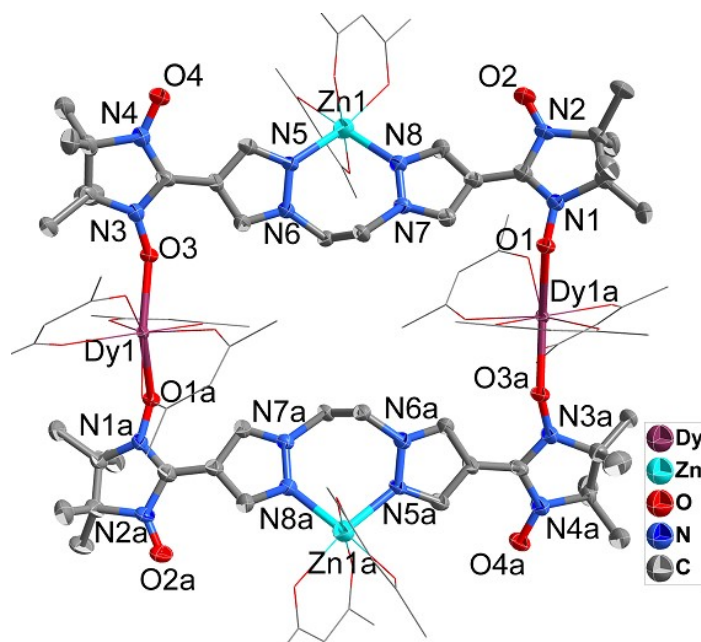

**Fig. S6.** Molecular structure for **DyZn-3**. Free solvent molecules, H and F atoms have been omitted.

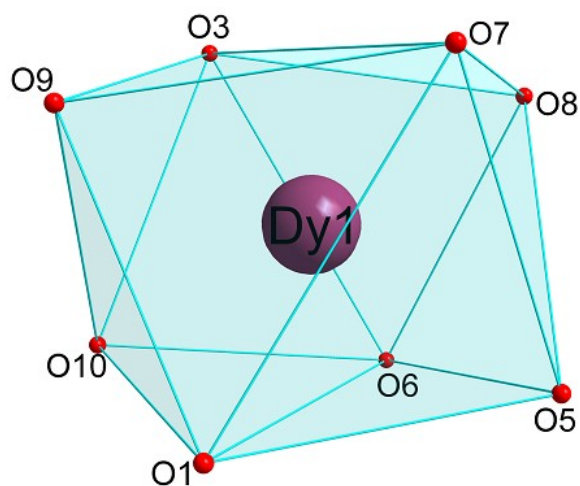

**Fig. S7.** Coordination environment of the Dy<sup>III</sup> ion in compound **DyZn-3**.

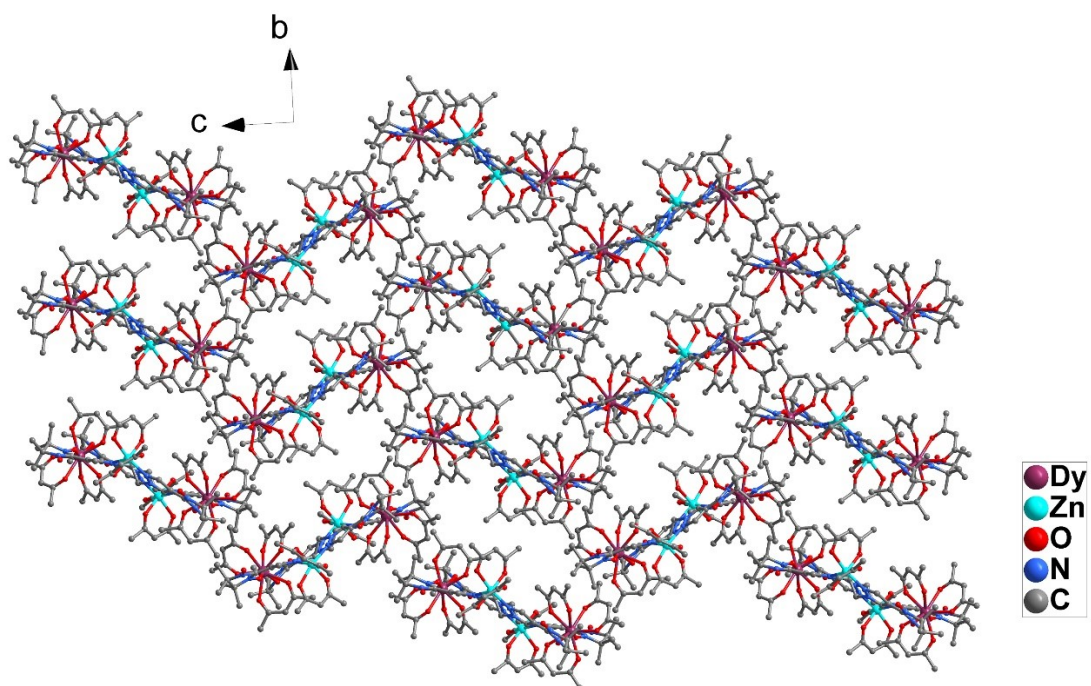

**Fig. S8.** Molecular packing along the *a*-axis direction for **DyZn-3**. Free solvent molecules, H and F atoms have been omitted.

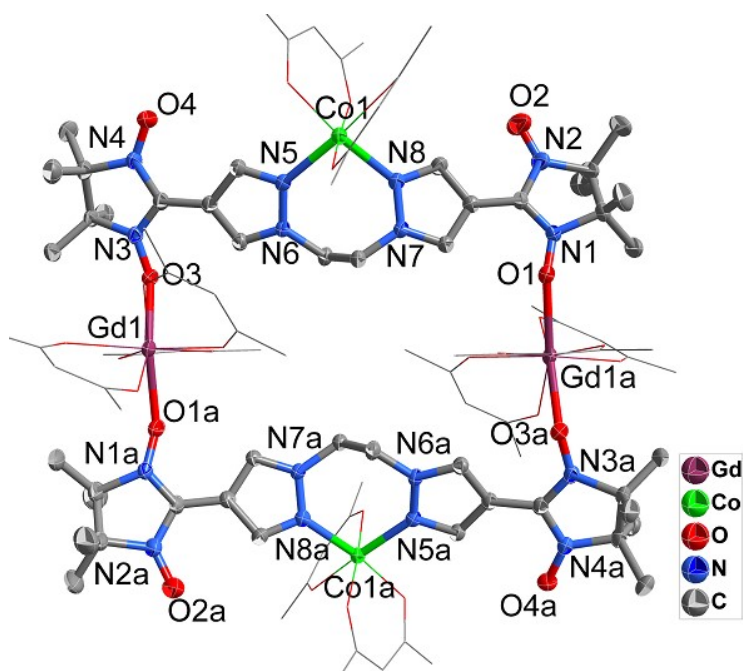

**Fig. S9.** Molecular structure for **GdCo-4**. Free solvent molecules, H and F atoms have been omitted.

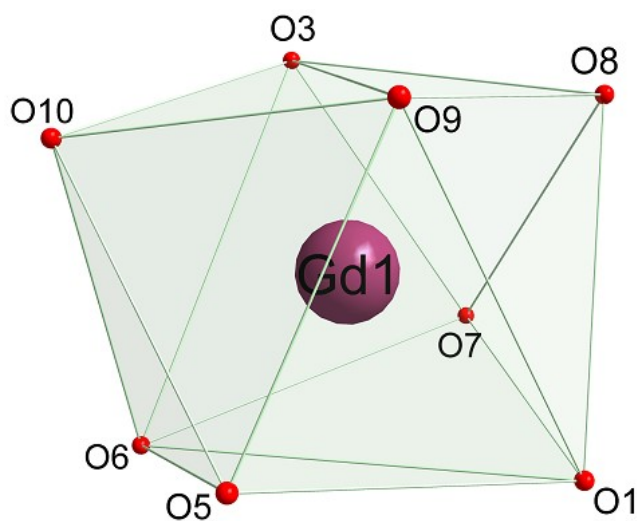

**Fig. S10.** Coordination environment of the Gd<sup>III</sup> ion in compound **GdCo-4**.

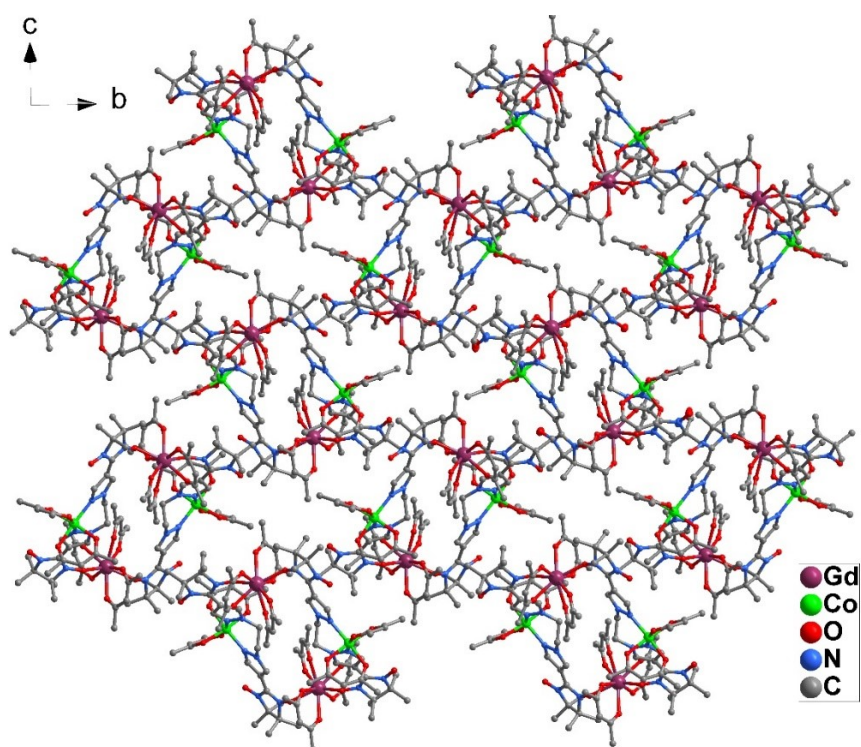

**Fig. S11.** Molecular packing along the *a*-axis direction for **GdCo-4**. Free solvent molecules, H and F atoms have been omitted.



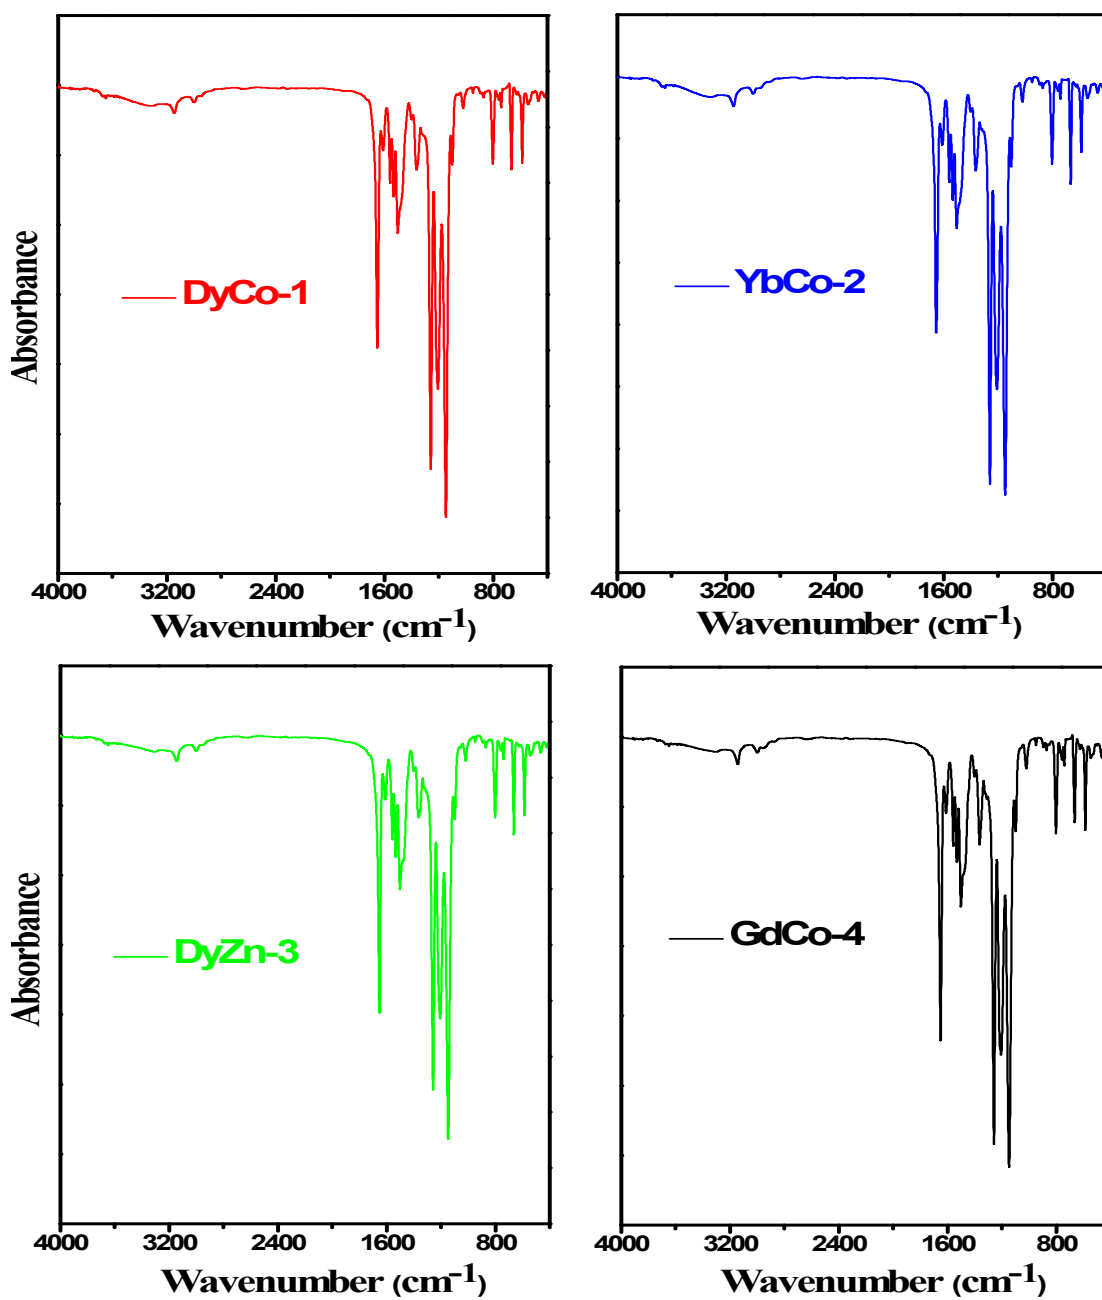

Fig. S12. Infrared spectra of complexes DyCo-1, YbCo-2, DyZn-3 and GdCo-4.

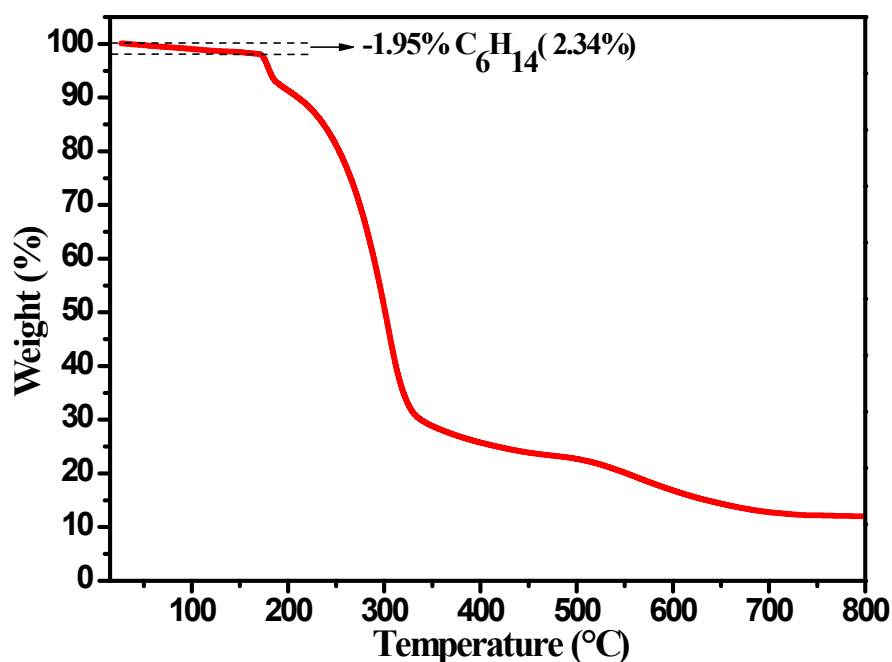

Fig. S13. Thermogravimetric curves of **DyCo-1** in N<sub>2</sub> atmosphere.

Thermogravimetric analysis was conducted from room temperature to 800 °C under N<sub>2</sub> atmosphere. A plateau up to ca. 172 °C, then, **DyCo-1** began to decompose. Since the CHCl<sub>3</sub> solvent is extremely volatile and has been volatilized before the thermogravimetric test, no weight loss was detected.

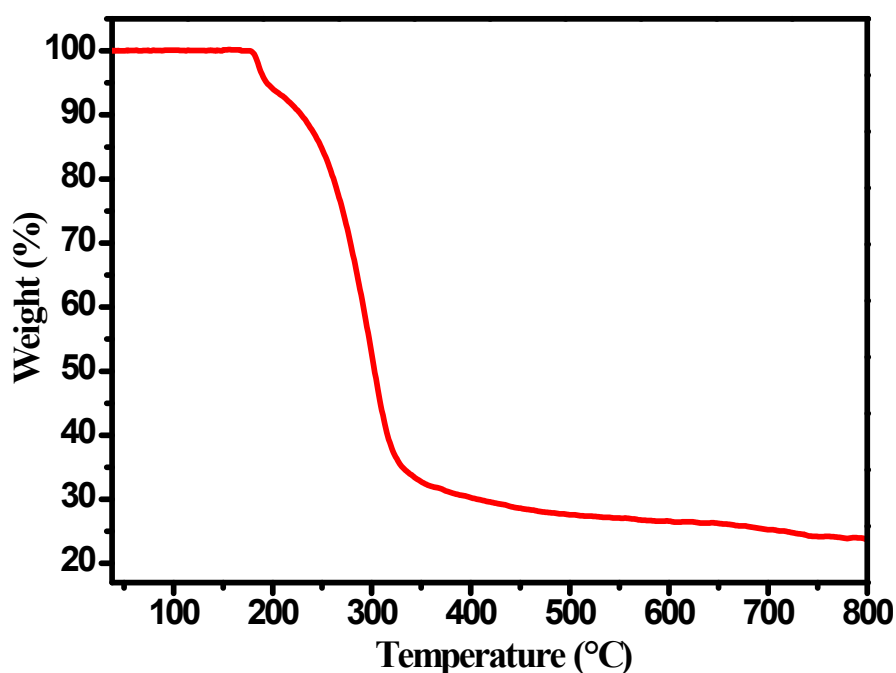

Fig. S14. Thermogravimetric curves of **YbCo-2** in N<sub>2</sub> atmosphere.

Thermogravimetric analysis was conducted from room temperature to 800 °C under N<sub>2</sub> atmosphere. A plateau up to ca. 177 °C, then, **YbCo-2** began to decompose. Since the CHCl<sub>3</sub> solvent is extremely volatile and has been volatilized before the thermogravimetric test, no weight loss was detected.

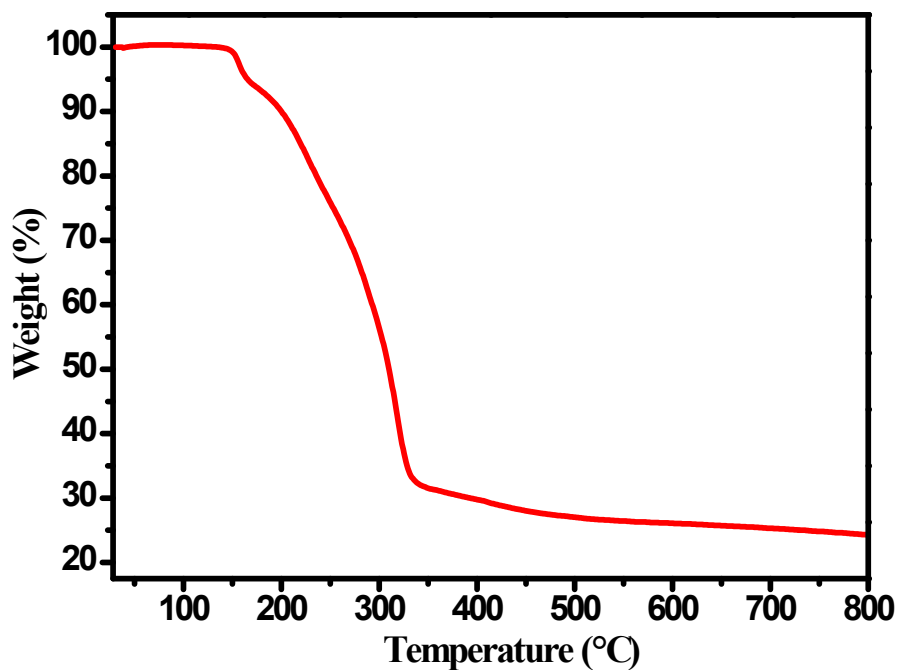

Fig. S15. Thermogravimetric curves of **DyZn-3** in N<sub>2</sub> atmosphere.

Thermogravimetric analysis was conducted from room temperature to 800 °C under N<sub>2</sub> atmosphere. A plateau up to ca. 150 °C, then, **DyZn-3** began to decompose. Since the CH<sub>2</sub>Cl<sub>2</sub> solvent is extremely volatile and has been volatilized before the thermogravimetric test, no weight loss was detected.

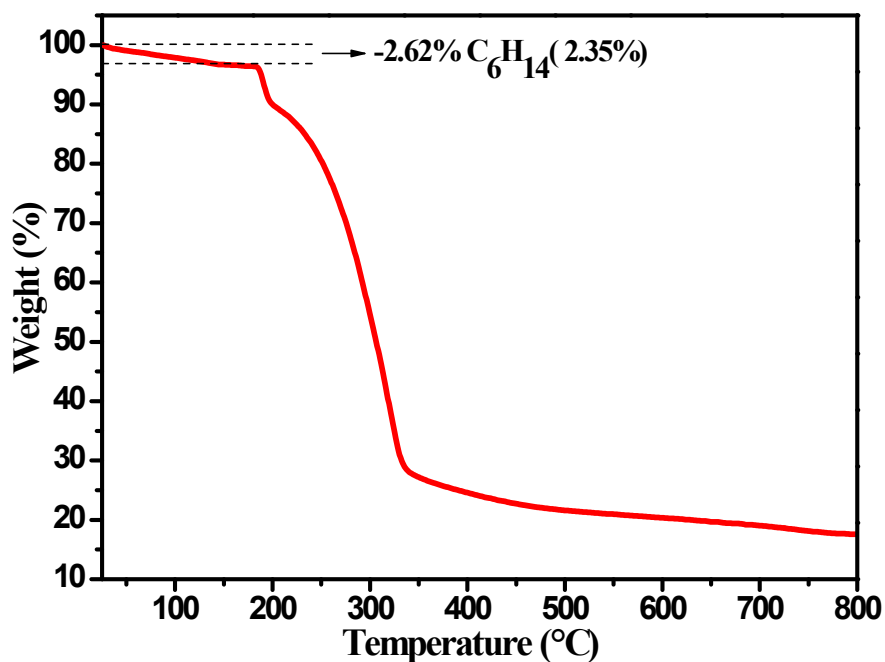

Fig. S16. Thermogravimetric curves of **GdCo-4** in N<sub>2</sub> atmosphere.

Thermogravimetric analysis was conducted from room temperature to 800 °C under N<sub>2</sub> atmosphere. A plateau up to ca. 184 °C, then, **GdCo-4** began to decompose. Since the CHCl<sub>3</sub> solvent is extremely volatile and has been volatilized before the thermogravimetric test, no weight loss was detected.



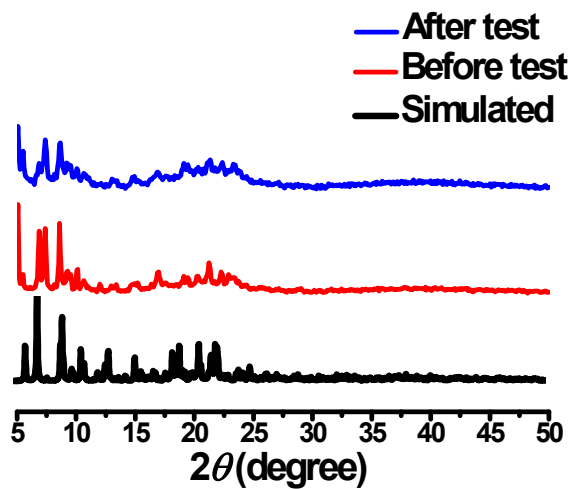

**Fig. S17.** PXRD patterns of DyCo-1 theoretical parameter, before and after the photothermal water evaporation.

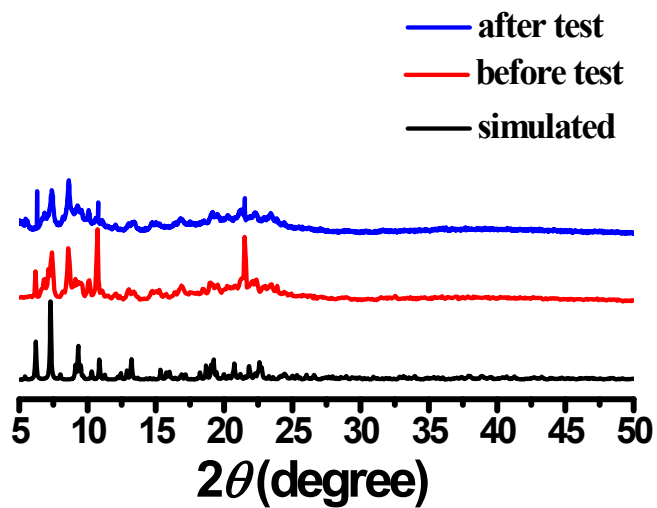

**Fig. S18.** PXRD patterns of YbCo-2 theoretical parameter, before and after the photothermal test.

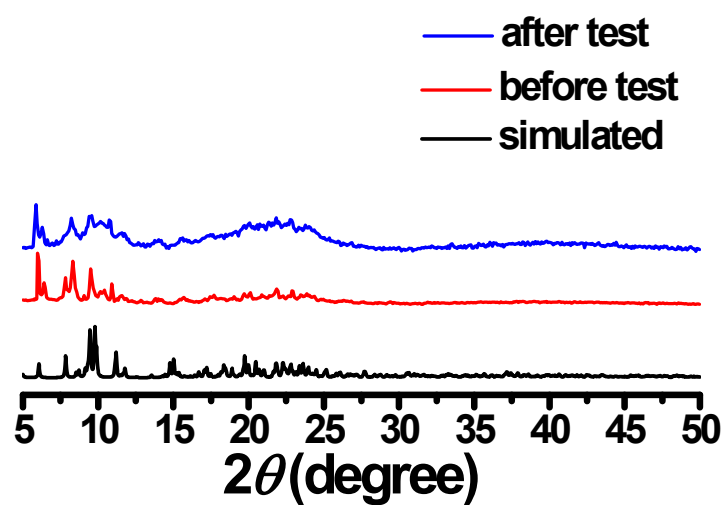

Fig. S19. PXRD patterns of DyZn-3 theoretical parameter, before and after the photothermal test.

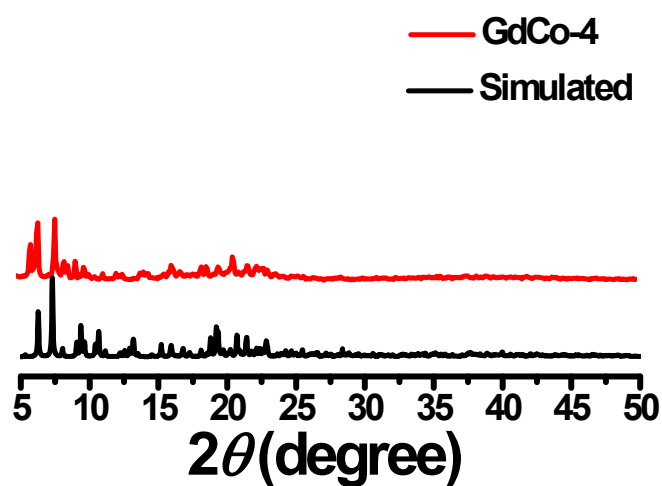

Fig. S20. Powder X-ray diffraction patterns of GdCo-4.

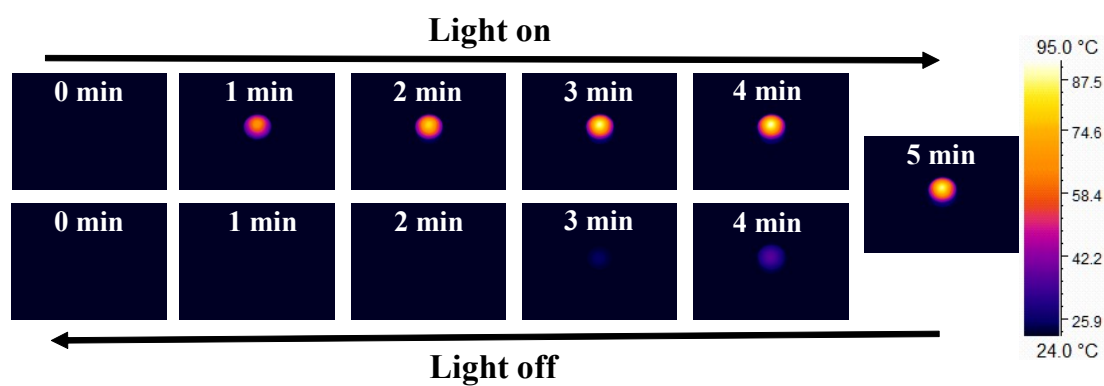

Fig. S21. IR thermal images of YbCo-2 under on and off irradiation of 1064 nm ( $0.3 \text{ W cm}^{-2}$ ) laser.

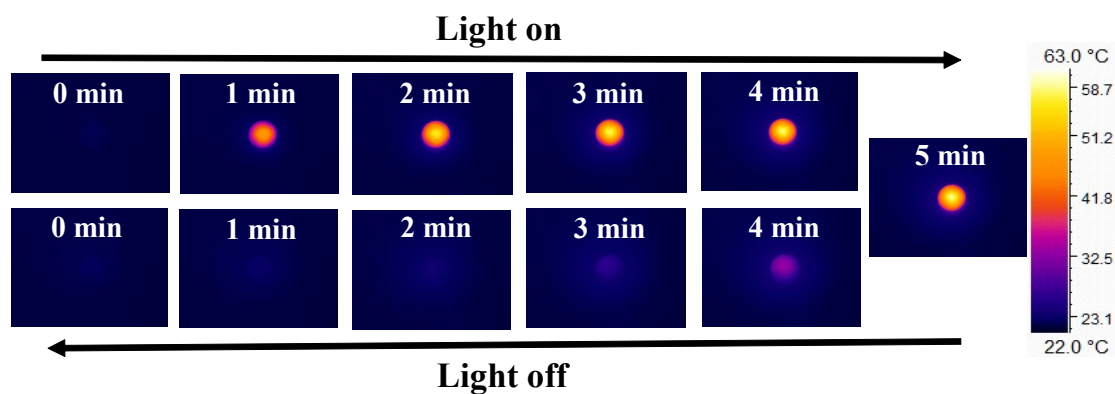

Fig. S22. IR thermal images of **DyZn-3** under on and off irradiation of 1064 nm ( $0.3 \text{ W cm}^{-2}$ ) laser.

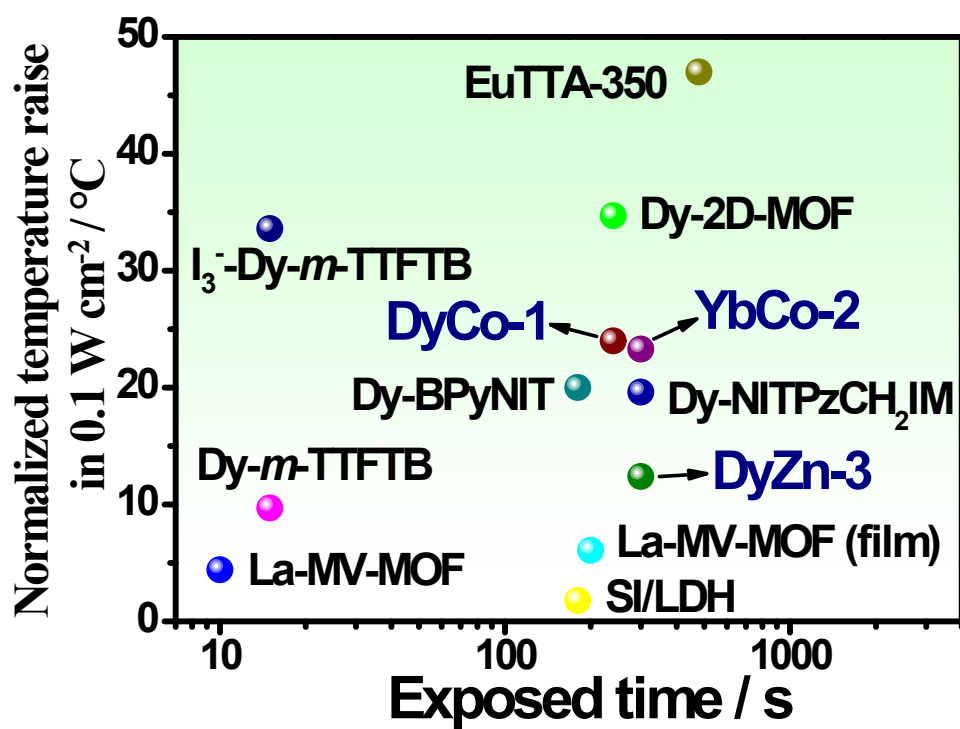

Fig. S23. The temperature increment of lanthanide-functional ligand photothermal materials normalized by one unit sunlight.

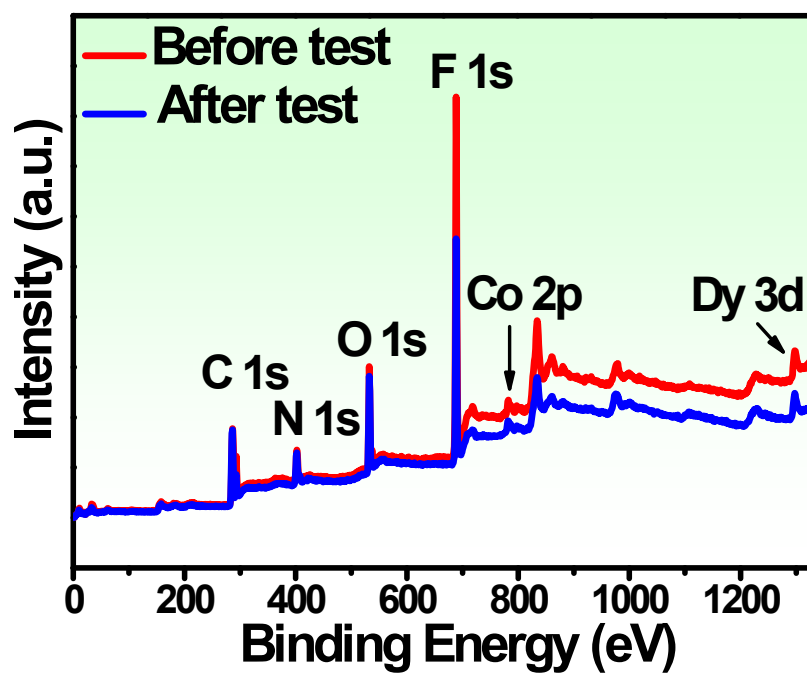

Fig. S24. XPS spectra of DyCo-1 before and after the photothermal test.

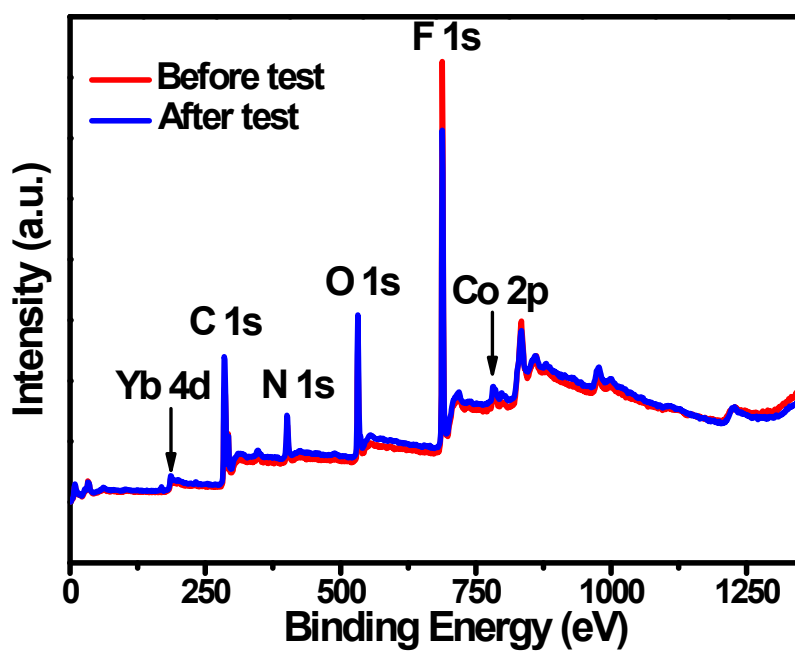

Fig. S25. XPS spectra of YbCo-2 before and after the photothermal test.

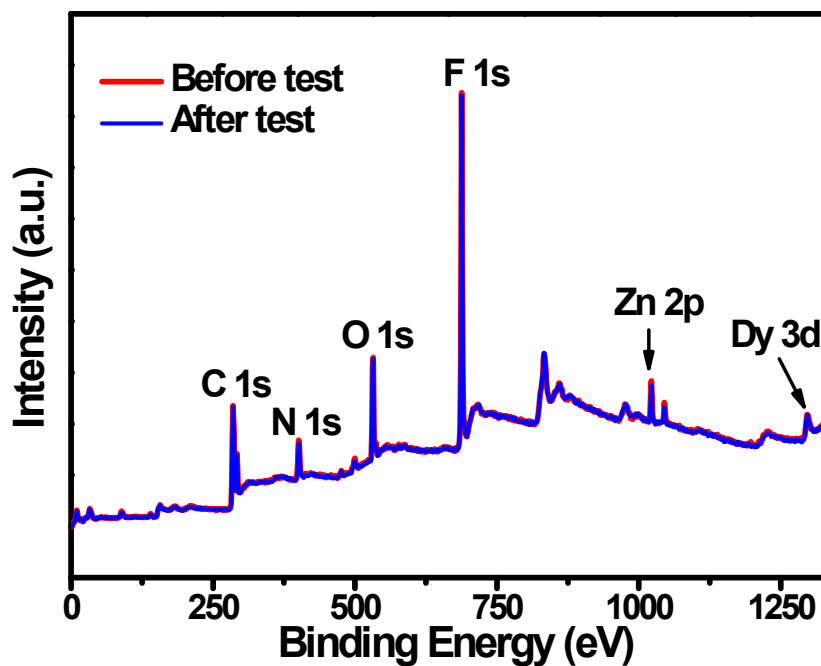

Fig. 26. XPS spectra of DyZn-3 before and after the photothermal test.

#### 4. Photothermal conversion efficiency calculation

The conversion efficiency was determined according to previous method<sup>S16</sup>. Details are as follows:

Based on the total energy balance for this system:

$$\sum_i m_i c_{pi} \frac{dT}{dt} = Q_s - Q_{loss}$$

where  $m_i$  (0.270 g) and  $C_{p,i}$  ( $0.8 \text{ J (g}^\circ\text{C)}^{-1}$ ) are the mass and heat capacity of system components, respectively.  $Q_s$  is the photothermal heat energy input by irradiating NIR laser to samples, and  $Q_{loss}$  is thermal energy lost to the surroundings. When the temperature is maximum, the system is in balance.

$$Q_s = Q_{loss} = hSA\Delta T_{max}$$

where  $h$  is heat transfer coefficient,  $S$  is the surface area of the container,  $\Delta T_{\max}$  is the maximum temperature change. The photothermal conversion efficiency  $\eta$  is calculated from the following equation:

$$\eta = \frac{hS\Delta T_{\max}}{I(1 - 10^{-A_{1064}})}$$

where  $I$  is the laser power (power density,  $0.3 \text{ W cm}^{-2}$ ) and  $A_{1064}$  is the absorbance of the sample (0.27 g) at the wavelength of 1064 nm (**DyCo-1**:  $A'_{1064} = 0.241$ ; **YbCo-2**:  $A'_{1064} = 0.166$ ; **DyZn-3**:  $A'_{1064} = 0.063$ ; m': 0.027 g). In order to obtain the  $hS$ , a dimensionless driving force temperature,  $\theta$  is introduced as follows:

$$\theta = \frac{T - T_{\text{surr}}}{T_{\max} - T_{\text{surr}}}$$

where  $T$  is the temperature of sample,  $T_{\max}$  is the maximum system temperature, and  $T_{\text{surr}}$  is the initial temperature.

The sample system time constant  $\tau_s$ :

$$\tau_s = \frac{\sum_i m_i C_{p,i}}{hS}$$

thus 
$$\frac{d\theta}{dt} = \frac{1}{\tau_s} \frac{Q_s}{hS\Delta T_{\max}} - \frac{\theta}{\tau_s}$$

when the laser is off,  $Q_s = 0$ , therefore 
$$\frac{d\theta}{dt} = -\frac{\theta}{\tau_s}, \text{ and } t = -\tau_s \ln \theta$$

so  $hS$  could be calculated from the slope of cooling time vs  $\ln \theta$ .

The detailed calculation results of each parameter are shown in the following table.

**Table S6.** The detailed calculation results of photothermal conversion efficiency  $\eta$ .

|               | $A$  | $T_{\text{surr}} / ^\circ\text{C}$ | $T_{\max} / ^\circ\text{C}$ | $\tau_s / \text{S}$ | $hS$    | $\eta$ |
|---------------|------|------------------------------------|-----------------------------|---------------------|---------|--------|
| <b>DyCo-1</b> | 2.41 | 24.2                               | 96.3                        | 68.87               | 0.00313 | 75.5%  |
| <b>YbCo-2</b> | 1.66 | 20.2                               | 90.0                        | 69.8                | 0.00302 | 71.9%  |
| <b>DyZn-3</b> | 0.63 | 23.8                               | 61.2                        | 61.23               | 0.00352 | 57.3%  |

**Table S7.** Photothermal property in this work compared with previous reported solid lanthanide/transition metal-based materials.

| Samples                           | Light source  | Light Intensity        | Added temperature  | Normalized temperature raise in 0.1 W cm <sup>-2</sup> | $\eta$ | Ref              |
|-----------------------------------|---------------|------------------------|--------------------|--------------------------------------------------------|--------|------------------|
| DyCo-bisNITCH <sub>2</sub> bz     | 1064 nm laser | 0.3 W cm <sup>-2</sup> | 72.0 °C in 4 min   | 24.0 °C in 4 min                                       | 75.5 % | <b>This work</b> |
| YbCo-bisNITCH <sub>2</sub> bz     | 1064 nm laser | 0.3 W cm <sup>-2</sup> | 67.8 °C in 5 min   | 22.6 °C in 5 min                                       | 71.9 % |                  |
| DyZn-bisNITCH <sub>2</sub> bz     | 1064 nm laser | 0.3 W cm <sup>-2</sup> | 37.4 °C in 5 min   | 12.4 °C in 5 min                                       | 57.3 % |                  |
| Dy-BPyNIT                         | 1064 nm laser | 0.1 W cm <sup>-2</sup> | 20.0 °C in 3 min   | 20.0 °C in 3 min                                       | 74.1 % | [S5]             |
| Dy-NITPzCH <sub>2</sub> IM        | 1064 nm laser | 0.1 W cm <sup>-2</sup> | 19.6 °C in 5 min   | 19.6 °C in 5 min                                       | 56.9 % | [S5]             |
| YbL@MSN                           | 690 nm laser  | 0.7 W cm <sup>-2</sup> | 23.0 °C in 900 s   | 3.28 °C in 900 s                                       | 45 %   | [S6]             |
| La-MV-MOF(film)                   | 808 nm laser  | 2 W cm <sup>-2</sup>   | 121.9 °C in 200 s  | 6.08 °C in 200 s                                       | 77 %   | [S7]             |
| La-MV-MOF(cryst)                  | 808 nm laser  | 2 W cm <sup>-2</sup>   | 88 °C in 10 s      | 4.4 °C in 10 s                                         | --     | [S7]             |
| Ag(TEPE)(AC)                      | 808 nm laser  | 1 W cm <sup>-2</sup>   | 134.7 °C in 30 s   | 13.4 °C in 30 s                                        | 51.8 % | [S8]             |
| Ag(TEPE)(NC)                      | 808 nm laser  | 1 W cm <sup>-2</sup>   | 87.2 °C in 40 s    | 8.7 °C in 40 s                                         | 36.2 % | [S8]             |
| Dy-2D-MOF                         | 1 sun light   | 0.1 W cm <sup>-2</sup> | 34.7 °C in 4 min   | 34.7 °C in 4 min                                       | --     | [S9]             |
| Dy- <i>m</i> -TTFB                | 808 nm laser  | 0.1 W cm <sup>-2</sup> | 9.7 °C in 15 s     | 9.7 °C in 15 s                                         | --     | [S10]            |
| I <sub>3</sub> Dy- <i>m</i> -TTFB | 808 nm laser  | 0.1 W cm <sup>-2</sup> | 33.6 °C in 15 s    | 33.6 °C in 15 s                                        | --     | [S10]            |
| S&I/LDH                           | 808 nm laser  | 0.5 W cm <sup>-2</sup> | 8.8 °C in 3 min    | 1.76 °C in 3 min                                       | --     | [S11]            |
| EuTTA-350                         | 420-2500 nm   | 0.1 W cm <sup>-2</sup> | 47 °C in 480 s     | 47 °C in 480 s                                         | --     | [S12]            |
| HKUST-1                           | 300-650 nm    | 0.5 W cm <sup>-2</sup> | 99.3 °C in 30 min  | 19.86 °C in 30 min                                     | 33.6 % | [S13]            |
| UiO-66                            | 300-650 nm    | 0.5 W cm <sup>-2</sup> | 31.8 °C in 30 min  | 6.36 °C in 30 min                                      | 5 %    | [S13]            |
| UiO-66-NH <sub>2</sub>            | 300-650 nm    | 0.5 W cm <sup>-2</sup> | 123.6 °C in 30 min | 24.72 °C in 30 min                                     | 59.3 % | [S13]            |
| ZIF-8                             | 300-650 nm    | 0.5 W cm <sup>-2</sup> | 44.4 °C in 30 min  | 8.88 °C in 30 min                                      | 0.3 %  | [S13]            |
| ZIF-67                            | 300-650 nm    | 0.5 W cm <sup>-2</sup> | 101.3 °C in 30 min | 20.26 °C in 30 min                                     | 50 %   | [S13]            |
| Fe-MIL-NH <sub>2</sub>            | 300-650 nm    | 0.5 W cm <sup>-2</sup> | 115.8 °C in 30 min | 23.16 °C in 30 min                                     | 86.6 % | [S13]            |
| IR-MOF-3                          | 300-650 nm    | 0.5 W cm <sup>-2</sup> | 92.2 °C in 30 min  | 18.44 °C in 30 min                                     | 25.8 % | [S13]            |
| CPO-27-Mg                         | 300-650 nm    | 0.5 W cm <sup>-2</sup> | 111.7 °C in 30 min | 22.34 °C in 30 min                                     | 21.6 % | [S13]            |
| THPTS-Pb                          | 1064 nm laser | 0.8 W cm <sup>-2</sup> | 64 °C in 180 s     | 8 °C in 180 s                                          | 15.2 % | [S14]            |
| Ag-2D-CPs                         | 800 nm laser  | 0.5 W cm <sup>-2</sup> | 24.5 °C in 3 min   | 4.9 °C in 3 min                                        | 22.1 % | [S15]            |

Assumption of the added temperature is in direct proportion to light intensity for approximate comparison. This column will give the value of the normalized temperature raise for these materials irradiated with the light of 0.1 W

cm<sup>-2</sup>. The raised temperatures were recorded when samples reached the steady-state, in which the temperature hardly raises by further illumination.  $\eta$ : photothermal conversion efficiency

## 5. Solar-driven water evaporation efficiency calculation

The efficiency ( $\eta$ ) was calculated based on the following equation<sup>S17</sup>:

$$\eta = mh_{LV}/C_{opt}P_0$$

where  $m$  refers to the mass flux (evaporation rate) of water,  $h_{LV}$  refers to the total liquid-vapor phase-change enthalpy (i.e., the sensible heat and the enthalpy of evaporation  $h_{LV} = Q + \Delta h_{vap}$ ),  $Q$  is the energy consumption to heat the system from the initial temperature  $T_0$  to the final temperature  $T$ ,  $\Delta h_{vap}$  is the latent heat of evaporation of water. And  $t$  is the normalized irradiation time (3600 s),  $P_0$  is the normalized solar irradiation value of 1 kW m<sup>-2</sup>, and  $C_{opt}$  represents the optical concentration.

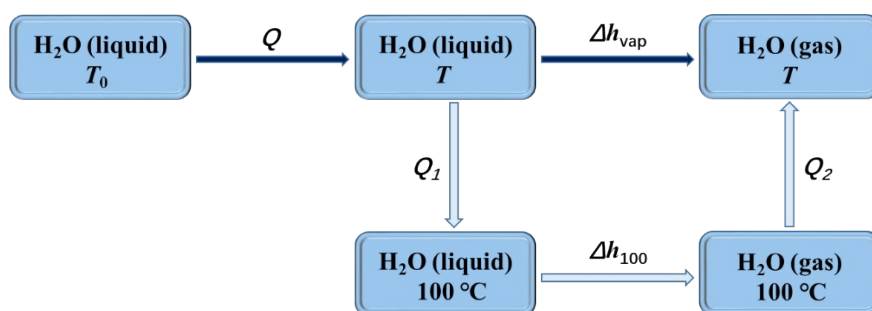

$$Q = C_{liquid} \times (T - T_0)$$

$$\Delta h_{vap} = Q_1 + \Delta h_{100} + Q_2$$

$$Q_1 = C_{liquid} \times (100^\circ\text{C} - T)$$

$$Q_2 = C_{vapor} \times (T - 100^\circ\text{C})$$

In the experiment,  $C_{liquid}$ , the specific heat capacity of water is a constant of 4.18 J g<sup>-1</sup> °C<sup>-1</sup>.  $C_{vapor}$ , the specific heat capacity of vapor is a constant of 1.865 J g<sup>-1</sup> °C<sup>-1</sup>.  $\Delta h_{100}$  is the latent heat of evaporation of water at 100 °C, taken to be 2260 kJ kg<sup>-1</sup>.

The surface temperature of DyCo-1-loaded PET was 42.8 °C ( $T$ ) during the evaporation process.

According to the above formulas,

$$Q = C_{liquid} \times (T - T_0) = 4.18 \times (42.8 - 23.2) = 81.93 \text{ kJ kg}^{-1}$$

$$\Delta h_{vap} = Q_1 + \Delta h_{100} + Q_2 = 4.18 \times (100 - 42.8) + 2260 + 1.865 \times (42.8 - 100) = 2392.41 \text{ kJ kg}^{-1}$$

$$\Delta h_{LV} = Q + \Delta h_{vap} = 81.93 + 2392.41 = 2474.34 \text{ kJ kg}^{-1}$$



$$m = 0.7728 \text{ kg m}^{-2} \text{ h}^{-1}$$

$$t = 3600 \text{ s}$$

$$P_0 = 1 \text{ kW m}^{-2}$$

$$C_{\text{opt}} = 1$$

$$\eta = mh_{\text{LV}}/C_{\text{opt}}P_0 = 53.1 \%$$

## 6. References

- [S1] E. F. Ullman, L. Call, J. H. Osiecki, Stable free radicals. VIII. New imino, amidino, and carbamoyl nitroxides. *J. Org. Chem.* 1970, **35**, 3623-3631.
- [S2] G. M. Sheldrick, SHELXS-2014, Program for Structure Solution; Universitat of Göttingen: Germany, 2014.
- [S3] G. M. Sheldrick, SHELXL-2014, Program for Structure Refinement; Universitat of Göttingen: Germany, 2014.
- [S4] A. L. Spek, PLATON-94 (V-101094), A Multipurpose Crystallographic Tool, University of Utrecht, The Netherlands, 1994.
- [S5] H. D. Li, C. Y. Jin, J. Han, J. K. Tang, X. F. Han, Z. J. Song, Near-infrared-II photothermal conversion and magnetic dynamic regulation in [Ln<sub>3</sub>Rad<sub>2</sub>] aggregation by rigidity modification of nitronyl nitroxide. *Inorg. Chem. Front.* 2024, **11**, 8421-8430.
- [S6] M. L. Zhu, H. Zhang, G. L. Ran, D. N. Mangel, Y. H. Yao, R. J. Zhang, J. Tan, W. K. Zhang, J. X. Song, J. L. Sessler, J. L. Zhang, Metal modulation: an easy-to-implement tactic for tuning lanthanide phototheranostics. *J. Am. Chem. Soc.* 2021, **143**, 7541-7552.
- [S7] S. Wang, S. Li, J. Xiong, Z. Lin, W. Wei, Y. Xu, Near-infrared photothermal conversion of stable radicals photoinduced from a viologen-based coordination polymer. *Chem. Commun.* 2020, **56**, 7399-7402.
- [S8] P. Y. Liao, J. X. Li, J. C. Liu, Q. Xiong, Z. Y. Ruan, T. Li, W. Deng, S. D. Jiang, J. H. Jia, M. L. Tong, Radical-Induced Photochromic Silver(I) Metal-Organic Frameworks: Alternative Topology, Dynamic Photoluminescence and Efficient Photothermal Conversion Modulated by Anionic Guests. *Angew. Chem. Int. Ed.* 2024, **136**, e202401448.
- [S9] J. Su, N. Xu, R. Murase, Z. M. Yang, D. M. D'Alessandro, J. L. Zuo, J. Zhu, Persistent Radical Tetrathiafulvalene-Based 2D Metal-Organic Frameworks and Their Application in Efficient Photothermal Conversion. *Angew. Chem. Int. Ed.* 2021, **60**, 4789-4795.
- [S10] J. Su, P. Y. Cai, T. Yan, Z. M. Yang, S. Yuan, J. L. Zuo, H. C. Zhou, Enhancing the photothermal conversion of tetrathiafulvalene-based MOFs by redox doping and plasmon resonance. *Chem. Sci.* 2022, **13**, 1657-1664.
- [S11] X. Mei, J. L. Ma, X. Bai, X. Zhang, S. M. Zhang, R. Z. Liang, M. Wei, D. G. Evans, X. Duan, A bottom-up synthesis of rare-earth-hydroxalate monolayer nanosheets toward multimode imaging and synergetic therapy. *Chem. Sci.* 2018, **9**, 5630-5639.
- [S12] X. H. Ye, L. H. Chung, K. Li, S. Zheng, Y. L. Wong, Z. H. Feng, Y. H. He, D. Chu, Z. T. Xu, L. Yu, J. He, Organic radicals stabilization above 300° C in Eu-based coordination polymers for solar steam generation. *Nat Commun.* 2022, **13**, 6116.
- [S13] J. Espin, L. Garzon-Tovar, A. Carne-Sanchez, I. Imaz, D. Maspoch, Photothermal activation of metal-organic frameworks using a UV-vis light source. *ACS Appl. Mater. Interfaces.* 2018, **10**, 9555-9562.
- [S14] J. Z. Liao, Z. C. Zhu, S. T. Liu, H. Ke, Photothermal Conversion Perylene-Based Metal-Organic Framework with Panchromatic Absorption Bandwidth across the Visible to Near-Infrared. *Inorg. Chem.* 2024, **63**, 3327-3334.

- [S15] M. Q. Li, M. Zhao, L. Y. Bi, Y. Q. Hu, G. Gou, J. Li, Y. Z. Zheng, Two-dimensional silver (I)-dithiocarboxylate coordination polymer exhibiting strong near-infrared photothermal effect. *Inorg. Chem.* 2019, **58**, 6601-6608.
- [S16] B. Lü, Y. Chen, P. Li, B. Wang, K. Müllen, M. Yin, Stable radical anions generated from a porous perylenediimide metal-organic framework for boosting near-infrared photothermal conversion. *Nat. Commun.* 2019, **10**, 767.
- [S17] Q. Ma, P. Yin, M. Zhao, Z. Luo, Y. Huang, Q. He, Y. Yu, Z. Liu, Z. Hu, B. Chen, H. Zhang, MOF-based hierarchical structures for solar-thermal clean water production. *Adv. Mater.* 2019, **31**, 1808249.
